# Supplementary material for: Fabrication of open-ended high aspect-ratio anodic TiO2 nanotube films for photocatalytic and photoelectrocatalytic applications
Source: Royal Society of Chemistry journal article supplement (doi:10.1039/b813937g), 2008-01-01
Supplement: b813937g.pdf [file b813937g.pdf]

## Electronic Supplementary Information

### Fabrication of opened-end high-aspect-ratio anodic TiO<sub>2</sub> nanotube film for photocatalytic and photoelectrocatalytic applications

Chin-Jung Lin, Wen-Yueh Yu, Yen-Tien Lu and Shu-Hua Chien\*

1. The X-ray diffraction (XRD) profiles of the annealed TiO<sub>2</sub> nanotube (TiNT) film and the sol-gel processed TiO<sub>2</sub> nanoparticles (NP-TiO<sub>2</sub>) were recorded on an X'Pert spectrometer (Philips) using the Cu-K $\alpha$  radiation ( $\lambda = 1.5406 \text{ \AA}$ ). Both exhibit the characteristic peaks of the anatase phase (JCPDS #21-1272). The average crystalline sizes of the TiNT film and the NP-TiO<sub>2</sub> are 15.2 nm and 8.0 nm, respectively, as estimated according to the Scherrer equation based on (101) diffraction peak.

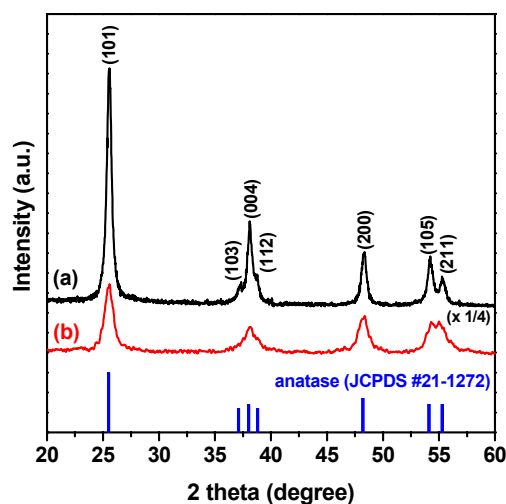

Figure S1. XRD profiles of (a) the annealed TiO<sub>2</sub> nanotube (TiNT) film and (b) the sol-gel processed TiO<sub>2</sub> nanoparticles (NP-TiO<sub>2</sub>).

2. The Scanning Electron Microscopy (SEM) was taken on JEOL JSM-5400. Figure S2 is the SEM image of the side view of the TiNT/FTO electrode. It is clear that the thick TiNT film atop a thin layer of NP-TiO<sub>2</sub>.

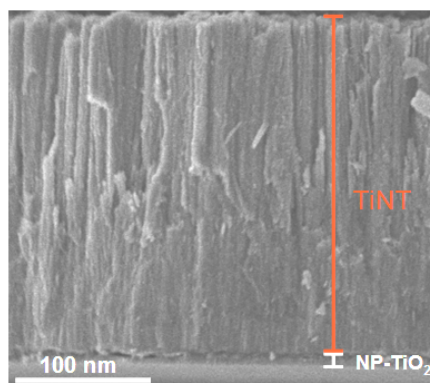

Figure S2. The SEM image of the side view of the TiNT/FTO electrode.

3. Photoelectrocatalytic water splitting by NP-TiO<sub>2</sub>/FTO :

Figure S3 shows the current density obtained with a film containing exclusively TiO<sub>2</sub> nanoparticles. A maximum conversion efficiency of 0.36% was obtained that is about half of the efficiency obtained by using the opened-end TiNT/FTO electrode.

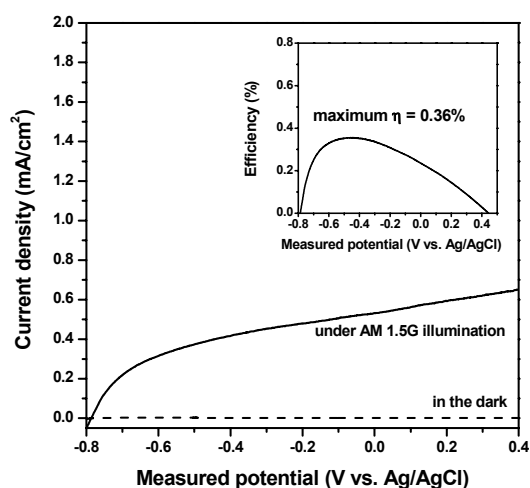

Figure S3. Current density-potential characteristics for water splitting using the NP-TiO<sub>2</sub>/FTO electrode in the dark and under AM 1.5G illumination (the inset is the corresponding photoconversion efficiencies).
